# Supplementary material for: Effect of Sub-inhibitory Dose of Cefotaxime on Multidrug resistant Staphylococcus haemolyticus Isolates
Source: Preprints.org preprint supplement (doi:10.20944/preprints202109.0026.v1), 2021-09-01
Supplement: Supplementary file 1 [file supplementary]

## Sheet: Supplementary table 1
S1: Subjects included in the study
Specimen ID	Delivery mode	Preterm/term	Birth Weight (Grams)	Days in the SNCU	Prescription	Clinical symptoms	C-Reactive protein test
JNM5	Vaginal	0	2600	13	Cefotaxime, Amikacin, Meropenam	Respiratory distress	Positive
JNM6	Vaginal	0	2250	9	Cefotaxime, Amikacin, Amoxycillin, Piperacillin-Tazobactam, cefoperazone; Meropenam, Amikacin	Meconium aspiration	Positive
JNM7	C-section	1	2800	22	Cefotaxime, Amikacin	Meningitis with probable sepsis	Positive
JNM8	Vaginal	2	800	10	Cefotaxime, Amikacin, Meropenam+Fluconazole	Respiratory distress	Not Done
JNM9	Vaginal	1	1500	2	Cefotaxime	Lethargic & respiratory distress	Not Done
JNM10	C-section	1	1250	3	Cefotaxime, Amikacin, caffaine citrate	Respiratory distress	Not Done
JNM11	C-section	1	1000	3	Cefotaxime, Amikacin, caffaine citrate	Respiratory distress	Not Done
JNM12	Vaginal	2	900	24	Cefotaxime, Amikacin	Retinopathy of prematurity	Not Done
JNM13	Vaginal	2	700	24	Cefotaxime, Amikacin	NA	Not Done
JNM16	Vaginal	2	900	3	Cefotaxime, Amikacin	Perinatal asphyxia, respiratory distress	Not Done
JNM17	Vaginal	2	980	2	Cefotaxime, Amikacin	Respiratory distress	Not Done
JNM18	Vaginal	2	1000	4	Cefotaxime, Amikacin	Gasping, oxygen saturation 25%, peripheral cynosis	Not Done
JNM19	Vaginal	2	900	26	Cefotaxime, Amikacin	Perinatal asphyxia	Not Done
JNM23	C-section	2	1800	6	Cefotaxime, Amikacin; Meropenem, Linezolid	Very low birth weight/twin to twin transfusion	Not Done
JNM24	C-section	2	1700	1	Cefotaxime, Amikacin	Very low birth weight/twin to twin transfusion/ascitis	Not Done
JNM25	C-section	2	1100	18	Cefotaxime, Amikacin; Meropenem, Linezolid	Respiratory distress	Not Done
JNM28	C-section	2	1200	5	Cefotaxime, Amikacin, Meropenem	Respiratory distress	Not Done
JNM32	Vaginal	2	1000	0	Cefotaxime, Amikacin	Lack of amniotic fluid	Not Done
JNM34	Vaginal	2	2000	4	Cefotaxime, Piperacillin-Tazobactam, Meropenam, Amikacin	Probable sepsis	Positive
JNM35	Vaginal	2	740	3	Cefotaxime, Amikacin	NA	Not Done
JNM36	Vaginal	0	2255	6	Cefotaxime, Amikacin; Meropenem, Linezolid	Respiratory distress, neonatal convulsions	Positive
JNM38	Vaginal (forceps)	0	2470	7	Cefotaxime, Amikacin	Meconium aspiration, Respiratory distress	Positive
JNM43	C-section	0	2500	2	NA	Perinatal Asphyxia	Not Done
JNM46	Vaginal	0	2750	NA	Cefotaxime	Pneumonia & respiratory distress	Not Done
JNM49	C-section	0	1500	4	NA	Respiratory distress & hyperthermia	Not Done
JNM50	Vaginal (forceps)	1	2000	4	NA	Refusal to feed	Not Done
JNM51	C-section	1	1700	0	Pipericillin-Tazobactam, Amikacin	Hypothermia & hypogycemia, low Calcium	Not Done
JNM53	Vaginal	1	1600	1/4	Piperacillin-Tazobactam, Amikacin	Refusal to feed, hypoglycemia	Not Done
JNM54	C-section	1	1900	1/3	Cefotaxime , Amikacin, Meropenam, Phenobarbital, Calcium	Low Calcium level & Neonatal convulsions	Positive
JNM55	C-section	1	2600	1	No antibiotics	Respiratory distress	Not Done
JNM56	C-section	2	2160	1	No antibiotics	Hypoglycemia	Not Done
JNM196	Vaginal	1	1540	0	NA	Respiratory distress	Not Done
JNM59	C-section	1	1600	9	No antibiotics	Low birth weight with respiratory distress	Not Done
JNM60	Vaginal	2	1340	3	Caffeine citrate, no antibiotics	Perinatal asphyxia, respiratory distress	Not Done

## Sheet: Supplementary table 2
S2: Summary of species identification, MIC values and resistance gene detection
Isolates	Species	CTX	CTX MIC (0.5McF)	AK	Ak MIC	GEN	GEN MIC (0.5McF)	MRP	MRP MIC	mecA	blaZ
JNM5C1	Staphylococcus haemolyticus	R	>256	I	24	R	32	I	8	Positive	Positive(f)
JNM7C1	Staphylococcus haemolyticus	R	>256	S	12	R	16	S	3	Positive	N
JNM8C3	Staphylococcus haemolyticus	R	>256	S	12	I	12	R	32	Positive	N
JNM9C1	Staphylococcus haemolyticus	R	>256	I	24	R	>256	I	12,8	Positive	N
JNM10C1	Staphylococcus haemolyticus	R	>256	S	4	R	24	R	32	Positive	Positive(b)
JNM11C2	Staphylococcus haemolyticus	R	>256	S	6	R	24	R	32	Positive	Positive(f)
JNM13C1	Staphylococcus haemolyticus	R	>256	S	>12	R	16	S	4	Positive	N
JNM16C1	Staphylococcus haemolyticus	R	>256	S	8	I	8,12	S	1.5,>1.5	Positive	N
JNM17C1	Staphylococcus haemolyticus	S	8	S	2	S	0.38	S	0.5	Positive	N
JNM24C1	Staphylococcus haemolyticus	R	>256	I	24	R	24	R	32	Positive	N
JNM25C1	Staphylococcus haemolyticus	R	>256	S	16	R	16	R	32	Negative	N
JNM28C1	Staphylococcus haemolyticus	R	>256	I	24	R	24	S	3	Positive	Positive(vvf)
JNM34C1	Staphylococcus haemolyticus	R	>256	I	32	R	>256	S	2	Positive	Positive(vvf)
JNM35C1	Staphylococcus haemolyticus	R	>256	S	3	I	12	I	6	Positive	Positive(vvf)
JNM36C3	Staphylococcus haemolyticus	UK	12	S	2	I	8	S	1.5	Positive	Positive(vvf)
JNM38C1	Staphylococcus haemolyticus	R	>256	S	16	R	16	I	8	Positive	Positive(vvf)
JNM43C1	Staphylococcus haemolyticus	R	>256	S	12	R	16	S	4	Positive	Positive(vvf)
JNM50C1a	Staphylococcus haemolyticus	S	3	S	1.5	S	0.38	S	0.125	Negative	N
JNM51C1	Staphylococcus haemolyticus	S	8	S	2	I	6	S	1	Positive	Positive(vf)
JNM55C1a	Staphylococcus haemolyticus	S	2	S	1.5	S	0.38	S	0.064	Negative	N
JNM56C1	Staphylococcus haemolyticus	R	>256	I	24	R	32	R	16	Positive	Positive(vf)
JNM53F2C1	Staphylococcus haemolyticus	R	>256	S	16	R	32	I	6	Positive	Positive(vf)
JNM54F1C1	Staphylococcus haemolyticus	R	>256	I	24	R	32	I	6	Positive	N
JNM60C2	Staphylococcus haemolyticus	R	>256	S	16	R	16	R	32	Positive	Positive(vf)
JNM12C3SM	Staphylococcus arlettae	S	1	S	0.75	S	0.19	S	0.32	Not done	Not done
JNM19C1	Staphylococcus aureus	I	24	S	3	S	4	S	0.25	Not done	Not done
JNM46C1	Staphylococcus aureus	S	4	S	3	S	0.75	S	0.125	Not done	Not done
JNM50C1b	Staphylococcus aureus	S	2	S	6	S	1	S	0.094	Not done	Not done
JNM53C1	Staphylococcus aureus	UK	12	S	8	R	24	S	0.19	Not done	Not done
JNM55C1b	Staphylococcus aureus	S	2	S	3	S	0.75	S	0.125	Not done	Not done
JNM6C2	Staphylococcus aureus	I	32	S	8	R	32	S	1.5	Not done	Not done
JNM8C2	Staphylococcus aureus	S	4	S	6	S	1	S	0.125	Not done	Not done
JNM196C1	Staphylococcus epidermidis	S	1.5	S	1.5	S	0.38	S	0.38	Not done	Not done
JNM32C1.2	Staphylococcus epidermidis	S	0.25	S	2	S	0.38	S	0.032	Not done	Not done
JNM54C1	Staphylococcus epidermidis	S	0.5	S	2	S	4	S	0.064	Not done	Not done
JNM59C1	Staphylococcus epidermidis	S	0.25	S	1.5	S	0.5	S	0.064	Not done	Not done
JNM7Ca	Staphylococcus epidermidis	I	32	S	6	R	32	S	1.5	Not done	Not done
JNM8C1	Staphylococcus epidermidis	UK	12	S	4	I	6	S	0.5	Not done	Not done
JNM23C1	Staphylococcus pseudointermedius	S	0.125	S	1.5	S	0.38	S	0.125	Not done	Not done
JNM18C1	Staphylococcus saprophyticus	UK	12	S	0.75	S	0.25	S	0.125	Not done	Not done
JNM49C2	Staphylococcus sciuri	S	8	S	3	I	8	S	0.125	Not done	Not done

## Sheet: Supplementary table 3
S3: Median optical density values obtained from crystal violet assays run to determine biofilm formation
	Median Optical Density values
Isolates	Control	TSBglu	TSBNaCl	TSBCTX
JNM5C1	0.18	0.23	0.3	0.705
JNM7C1	0.58	0.265	0.98	0.975
JNM8C3	0.59	0.45	0.9	0.985
JNM9C1	0.82	0.895	0.415	0.94
JNM10C1	0.185	0.25	0.46	0.79
JNM11C2	0.25	0.275	0.31	0.305
JNM13C1	0.405	0.31	0.505	1.105
JNM16C1	0.18	0.25	0.57	0.95
JNM24C1	0.165	0.165	0.51	0.255
JNM25C1	0.18	0.2	0.72	0.84
JNM28C1	0.21	0.19	0.615	0.725
JNM34C1	0.78	0.435	0.65	0.755
JNM35C1	0.675	0.375	0.41	0.805
JNM38C1	0.18	0.195	0.75	0.815
JNM43C1	0.135	0.19	0.415	0.745
JNM53F2C1	0.255	0.23	0.185	1.025
JNM54F1C1	0.255	0.215	0.21	0.965
JNM56C1	0.215	0.2	0.365	0.71
JNM60C2	0.295	0.36	0.51	1.045
JNM17C1	0.3	0.27	0.69	0.165
JNM36C3	0.88	0.81	0.81	0.135
JNM50C1a	0.2	0.19	0.215	0.09
JNM51C1	0.975	0.43	0.5	0.095
JNM55C1a	0.285	0.45	0.355	0.09
ATCC 35984	0.555	0.28	0.315	0.105

## Sheet: Supplementary table 4
S4: Extracellular eDNA quantitation values of 24-hour biofilms
Non-susceptible isolates
	Band intensity
Sample ID	Control	TSBglu	TSBNaCl	TSBCTX
JNM5C1	411682	698363	2168705	1402273
JNM7C1	0	754177	1583088	1271897
JNM8C3	346709	1066271	2142991	1286517
JNM9C1	709586	794640	2853523	1261663
JNM10C1	809604	476096	1163365	1575176
.JNM11C2	752027	333809	1437662	805003
JNM13C1	0	0	2175327	1373463
JNM16C1	208292	879221	1747520	1022411
JNM24C1	663490	531953	2666516	1440156
JNM25C1	448447	433010	1762183	717283
JNM28C1	762218	688172	2837570	1711357
JNM34C1	551174	576673	5508773	1962649
JNM35C1	462895	477214	2053250	1584636
JNM38C1	596367	767593	2038501	1622046
JNM43C1	638679	800359	1878197	1107551
JNM53F2C1	429312	619544	1564125	1060337
JNM54F1C1	583209	566611	1677688	1149820
JNM56C1	543821	953783	5721709	5078687
JNM60C2	0	684489	2369211	1571037
Susceptible isolates
JNM17C1	688430	1224511	3040186	660953
JNM36C3	2298952	1981354	2836022	765013
JNM50C1a	1011145	676261	1915736	465991
JNM51C1	625091	570051	1180221	346193
JNM55C1a	515484	498155	515484	370574

## Sheet: Supplementary table 5
S5-Summary of generation time values of isolates JNM56C1 and JNM60C2
Sample ID	5μl inoculum in 1000μl MHB 5μl spread						Generations
2hr
JNM56C1	No.of colonies		Volume plated on culture plate	Dilution factor	CFU/mL	Generation time(mins)
	16	20.7	0.005	2.5e-05	828000
	20		0.005	2.5e-05
	26		0.005	2.5e-05
JNM60C2
	8	16	0.005	2.5e-05	640000
	24		0.005	2.5e-05
	16		0.005	2.5e-05
4hr
Sample ID	1μl inoculum in 1000μl MHB 3μl spread
JNM56C1	No.of colonies		Volume plated on culture plate	Dilution factor	CFU/mL
	51	36.3	0.003	3e-06	12100000	30	720
	38		0.003	3e-06
	20		0.003	3e-06
JNM60C2
	19	14.7	0.003	3e-06	4900000	40	540
	3		0.003	3e-06
	22		0.003	3e-06

## Sheet: Supplementary table 6
S6: Antimicrobial assay values of JNM56C1 and JNM60C2 ancestral and evolved populations
Isolate ID	Minimum Inhibitory Concentration (µg/mL)
	Cefotaxime	Interpretation	Meropenem	Interpretation	Amikacin	Interpretation	Gentamicin	Interpretation
JNM56C1(A)	>256	Resistant	>32	Resistant	32	Intermediate	32	Resistant
JNM56C1(1)	>256	Resistant	>32	Resistant	32	Intermediate	48	Resistant
JNM56C1(2)	>256	Resistant	>32	Resistant	24	Intermediate	32	Resistant
JNM56C1(3)	>256	Resistant	>32	Resistant	32	Intermediate	32	Resistant
JNM60C2(A)	>256	Resistant	>32	Resistant	24	Intermediate	24	Resistant
JNM60C2(1)	>256	Resistant	>32	Resistant	24	Intermediate	24	Resistant
JNM60C2(2)	>256	Resistant	>32	Resistant	32	Intermediate	24	Resistant
JNM60C2(3)	>256	Resistant	>32	Resistant	24	Intermediate	24	Resistant

## Sheet: Supplementary table 7 
S7: Information on the primer sets used in this study
Name of the gene	Primers	Sequence(5'-3')	Amplification condition	Amplicon size(bp)	References
blaZ	blaZ-F	TACAACTGTAATATCGGAGGGTTT	95°C for 5 min 95°C for 30 sec 50°C for 1 min 15cycles 72°C for 50 sec 95°C for 30 sec 45°C for 1 min 20 cycles 72°C for 50 sec 72°C for 5min	858	This study
	blaZ-R	TTAAAATTCCTTCATTACACTCTTGG
mecA	mecA-F	AAAATCGATGGTAAAGGTTGGC	95°C for 5 min 95°C for 30 sec 55°C for 45 sec 15cycles 72°C for 1 min 95°C for 30 sec 53°C for 45 sec 20 cycles 72°C for 1 min 72°C for 5min	533	doi: 10.1128/AEM.69.11.6489-6494.2003
	mecA-R	AGTTCTGGAGTACCGGATTTGC
icaA	icaA-F	CCGATTTTTATGTCAATTTACTGG	95°C for 5 min 95°C for 30 sec 53°C for 30 sec 15cycles 72°C for 50 sec 95°C for 30 sec 50°C for 30 sec 20 cycles 72°C for 50 sec 72°C for 5min	166	This study
	icaA-R	GCGTGTCTTGAACTGTTTCACT
16S	16S-515(V4)-F	GTGYCAGCMGCCGCGGT	95°C for 5 min 95°C for 30 sec 50°C for 1 min 35 cycles 72°C for 30 sec 72°C for 5min	292	Modified from doi.org/10.1073/pnas.1000080107
	16S-806(V4)-R	GGACTACNVGGGTWTCTAAT
aacA-aphD	iaacA-aphD-F	AGCATTTTACACAGGAGTCTGGA	95°C for 5 min 95°C for 30 sec 60°C for 45 sec 3 cycles 72°C for 1.5 min 95°C for 30 sec 50°C for 45 sec 12 cycles 72°C for 1.5 min 95°C for 30 sec 45°C for 45 sec 20 cycles 72°C for 1.5 min 72°C for 5min	1658	This study
	iaacA-aphD-R	GGTAATCCTAGAGCTTGCCATGT
